# Supplementary material for: Electrospun polysuccinimide scaffolds containing different salts as potential wound dressing material
Source: publisher site journal article supplement (doi:10.3762/bjnano.15.65), 2024-07-02
Supplement: Additional file 1 [file 2190-4286-15-65-S1.pdf]

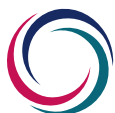

## Supporting Information

for

### **Electrospun polysuccinimide scaffolds containing different salts as potential wound dressing material**

Veronika Pálos, Krisztina S. Nagy, Rita Pázmány, Krisztina Juriga-Tóth, Bálint Budavári, Judit Domokos, Dóra Szabó, Ákos Zsembery and Angela Jedlovszky-Hajdu

*Beilstein J. Nanotechnol.* **2024**, *15*, 781–796. [doi:10.3762/bjnano.15.65](https://doi.org/10.3762/bjnano.15.65)

## Additional experimental data

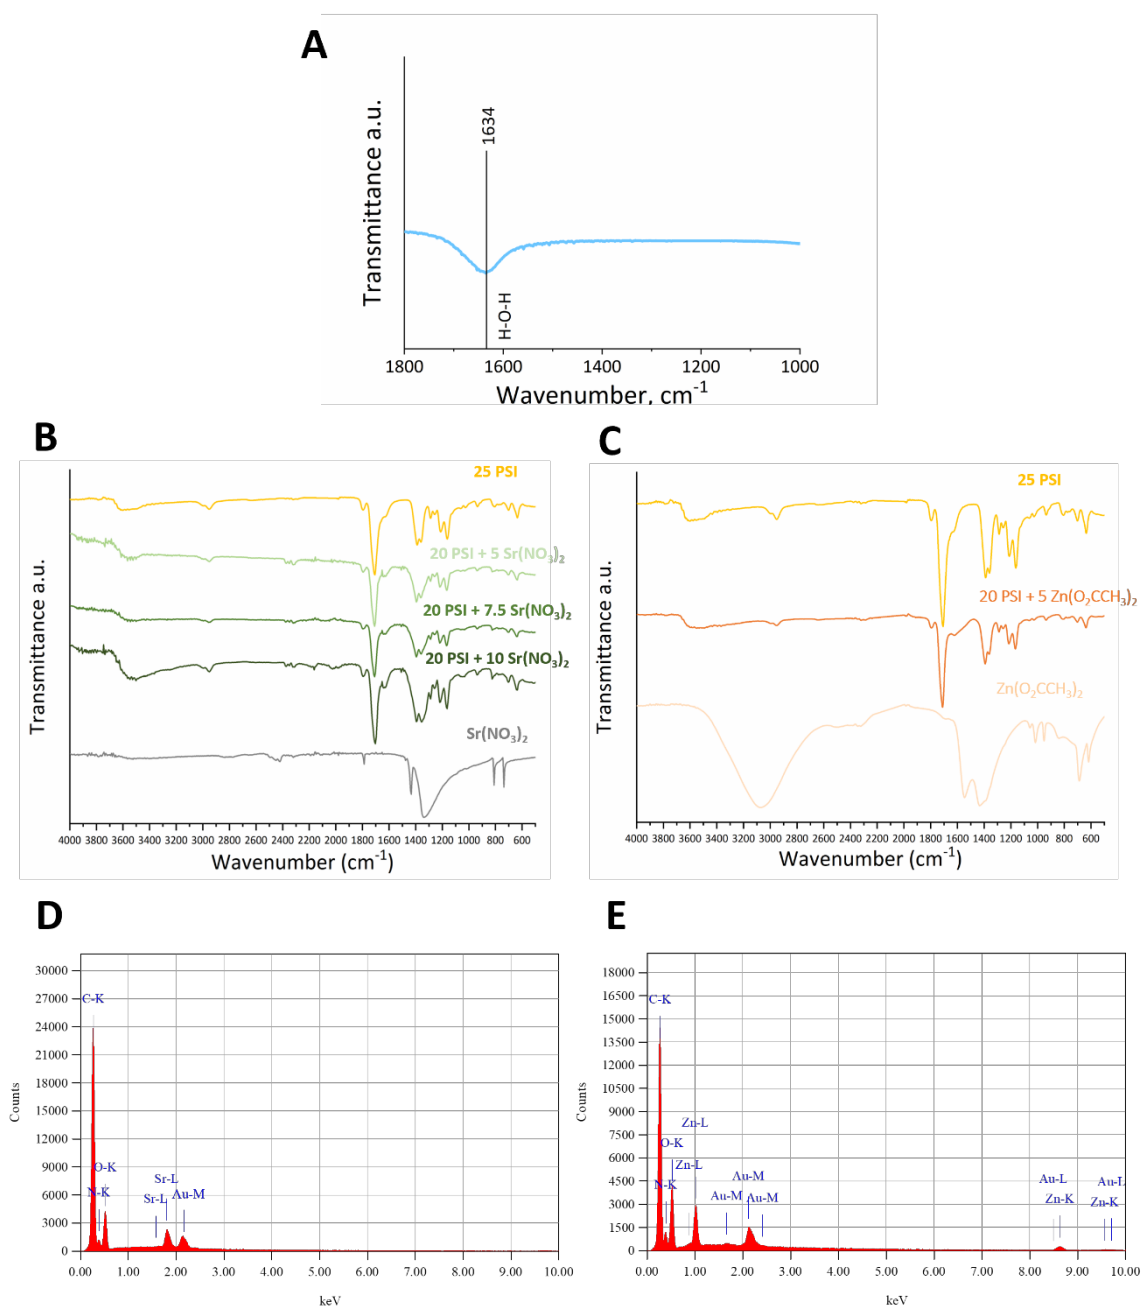

**Figure S1:** A) The FTIR spectra of water with the characteristic H–O–H bending vibration peak at  $1634\text{ cm}^{-1}$ . B) FTIR spectra of the  $\text{Sr}(\text{NO}_3)_2$  salt, scaffolds containing this salt, and 25 PSI scaffold between  $4000$  and  $500\text{ cm}^{-1}$ . C) FTIR spectra of the  $\text{Zn}(\text{O}_2\text{CCH}_3)_2$  salt, scaffold containing this salt, and 25 PSI scaffold between  $4000$  and  $500\text{ cm}^{-1}$ . D) EDX spectrum of the 20 PSI + 5  $\text{Sr}(\text{NO}_3)_2$  scaffold E) EDX spectrum of the 20 PSI + 5  $\text{Zn}(\text{O}_2\text{CCH}_3)_2$  scaffold.

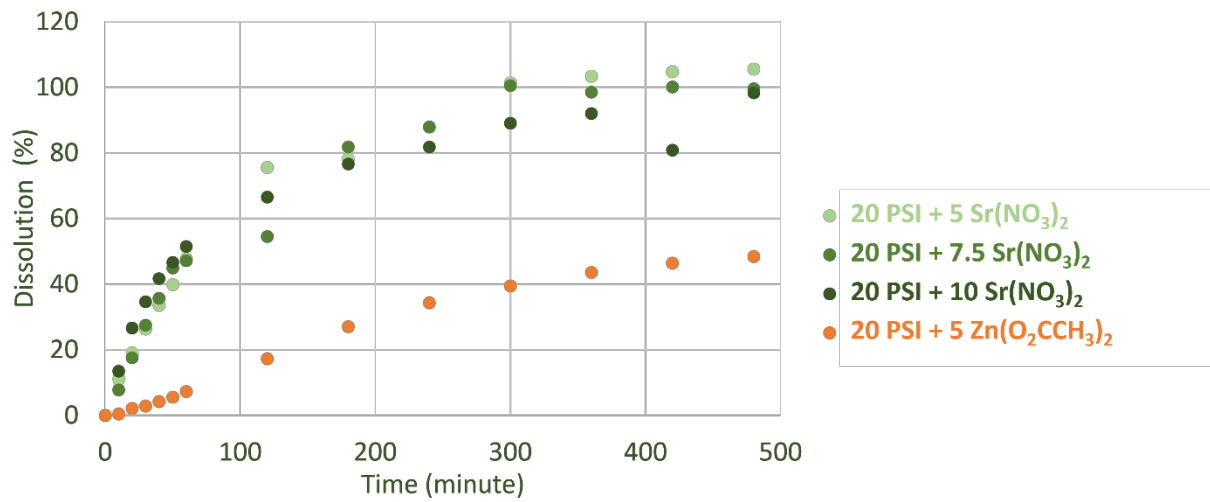

**Figure S2:** The dissolution of the scaffolds with different salt content in distilled water for 8 h.

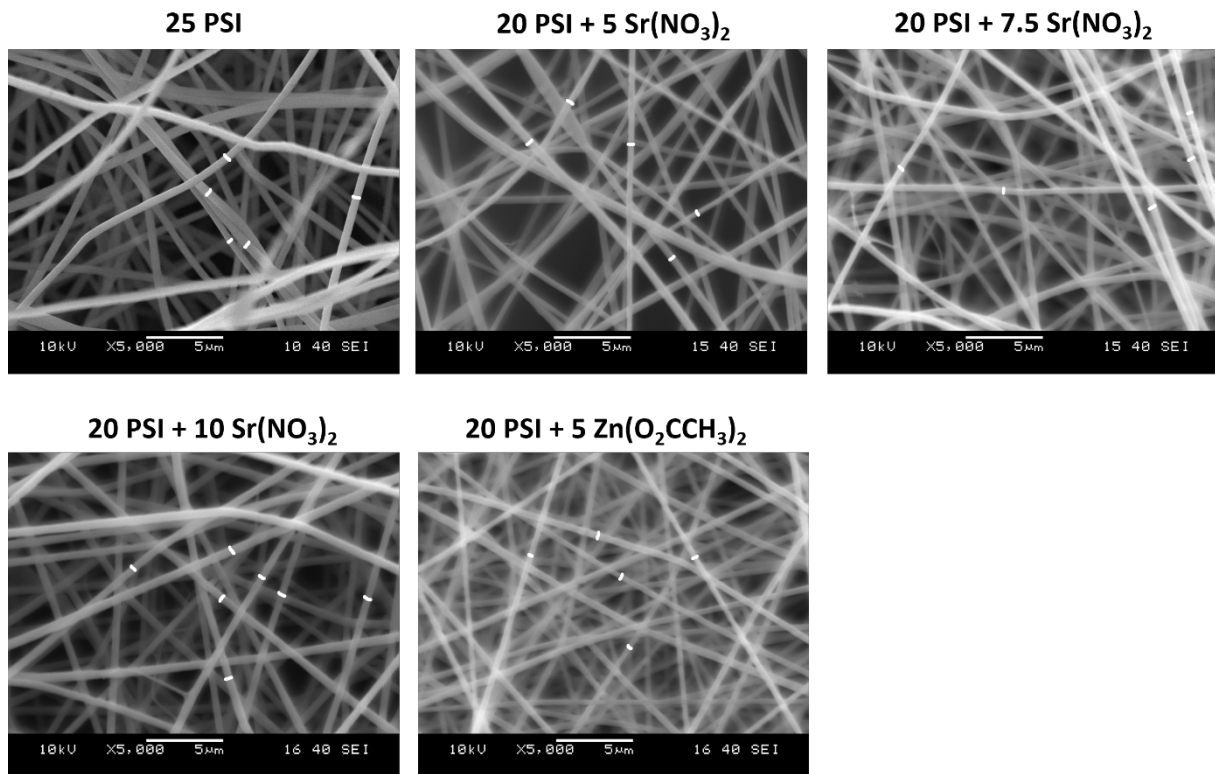

**Figure S3:** The process of fiber diameter determination by ImageJ.

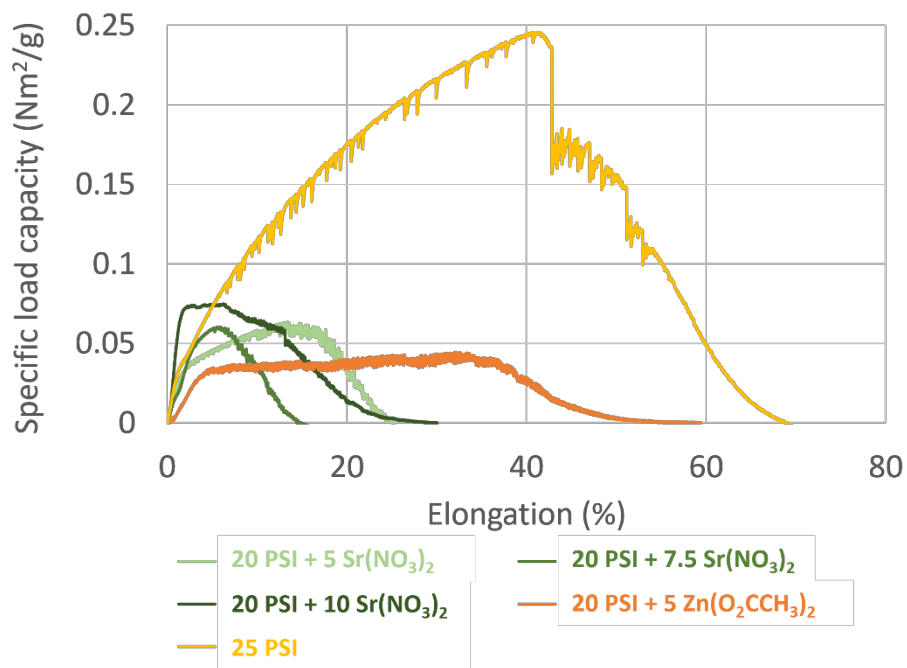

**Figure S4:** Elongation-specific load capacity graphs of different scaffolds.

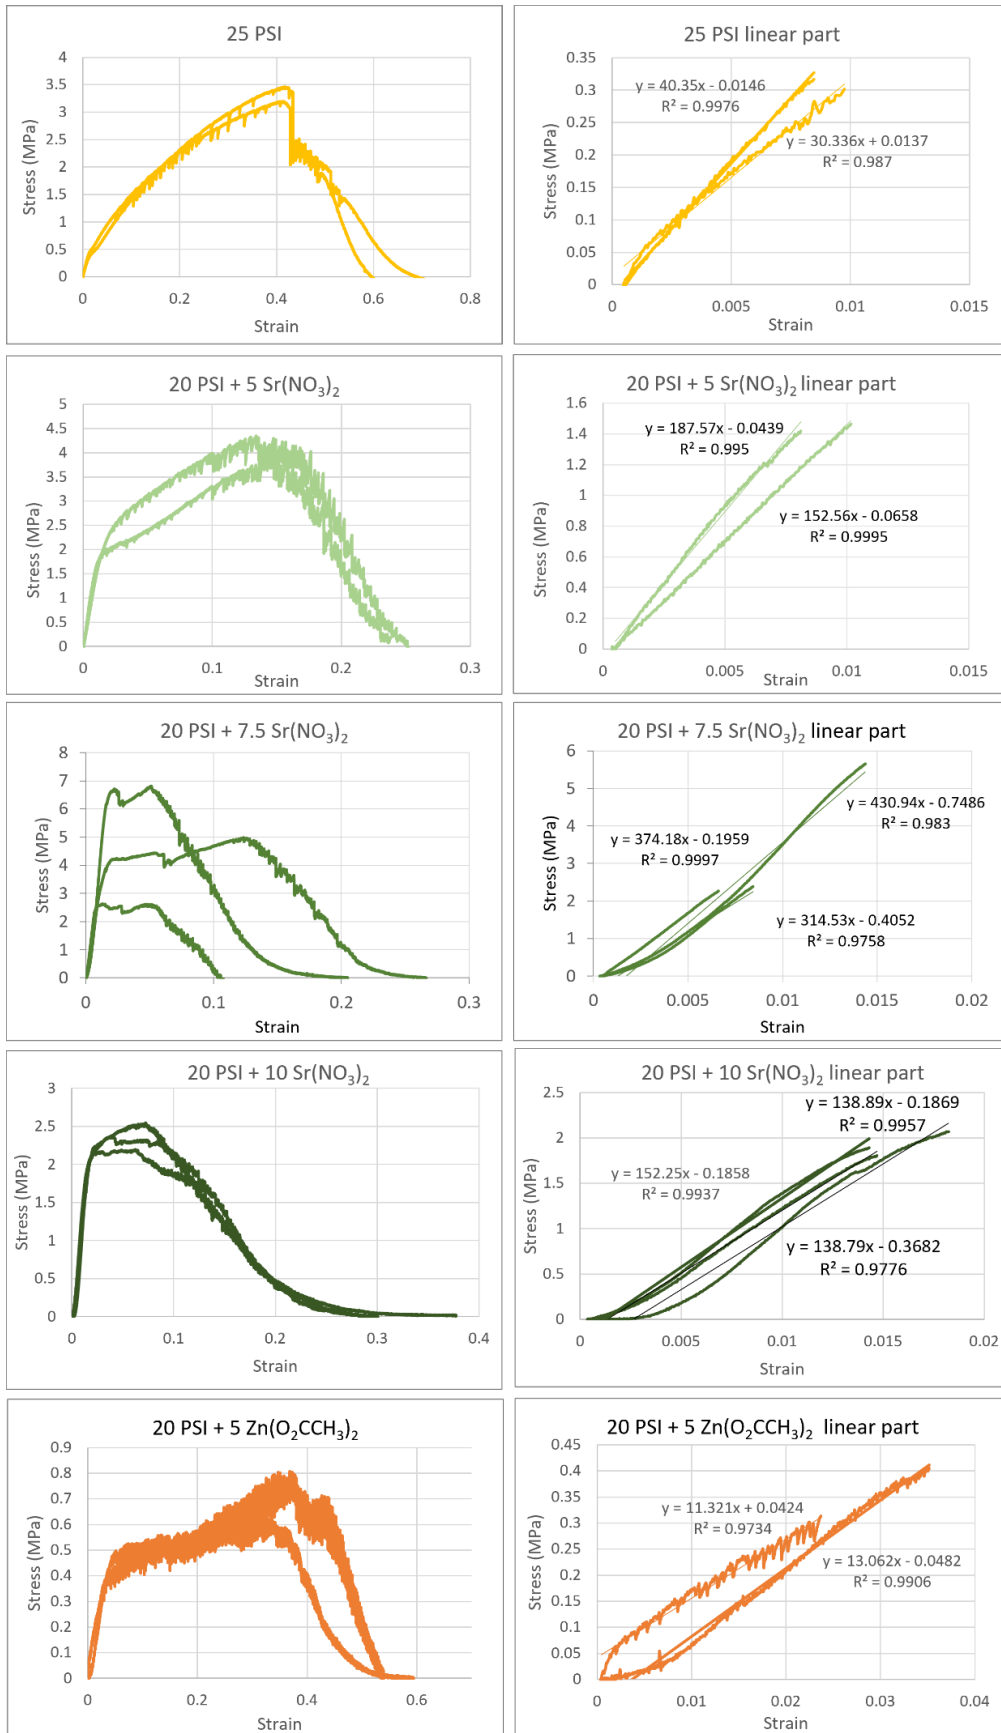

**Figure S5:** Typical stress–strain curves of 25 PSI and PSI + salt scaffolds, and the determination of the Young’s modulus from the linear part of the curve.

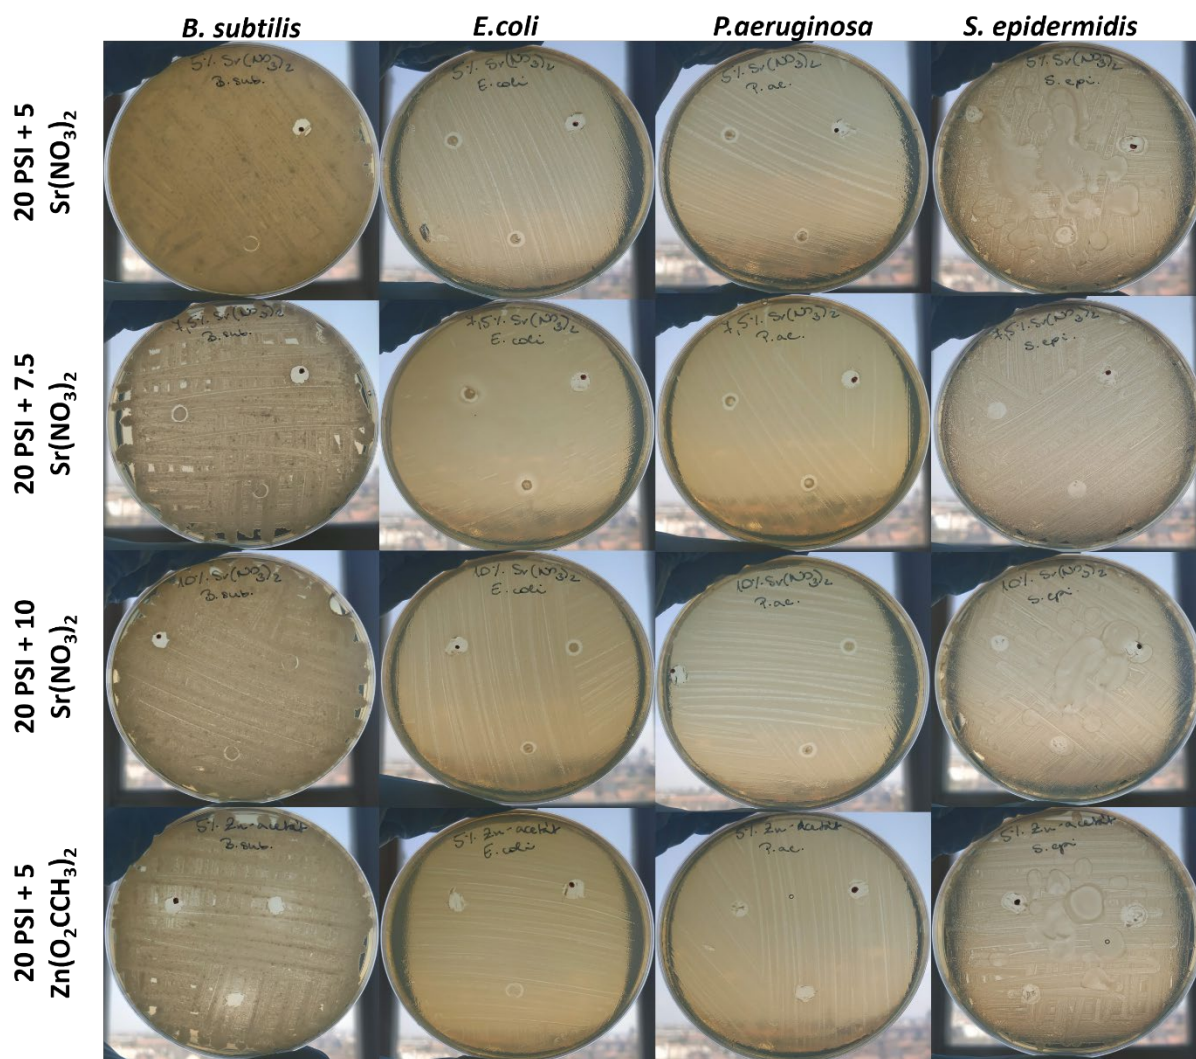

**Figure S6:** The inhibition and diffuse zones of salt-containing scaffolds on four different bacteria lawns.

# MG-63 cell line

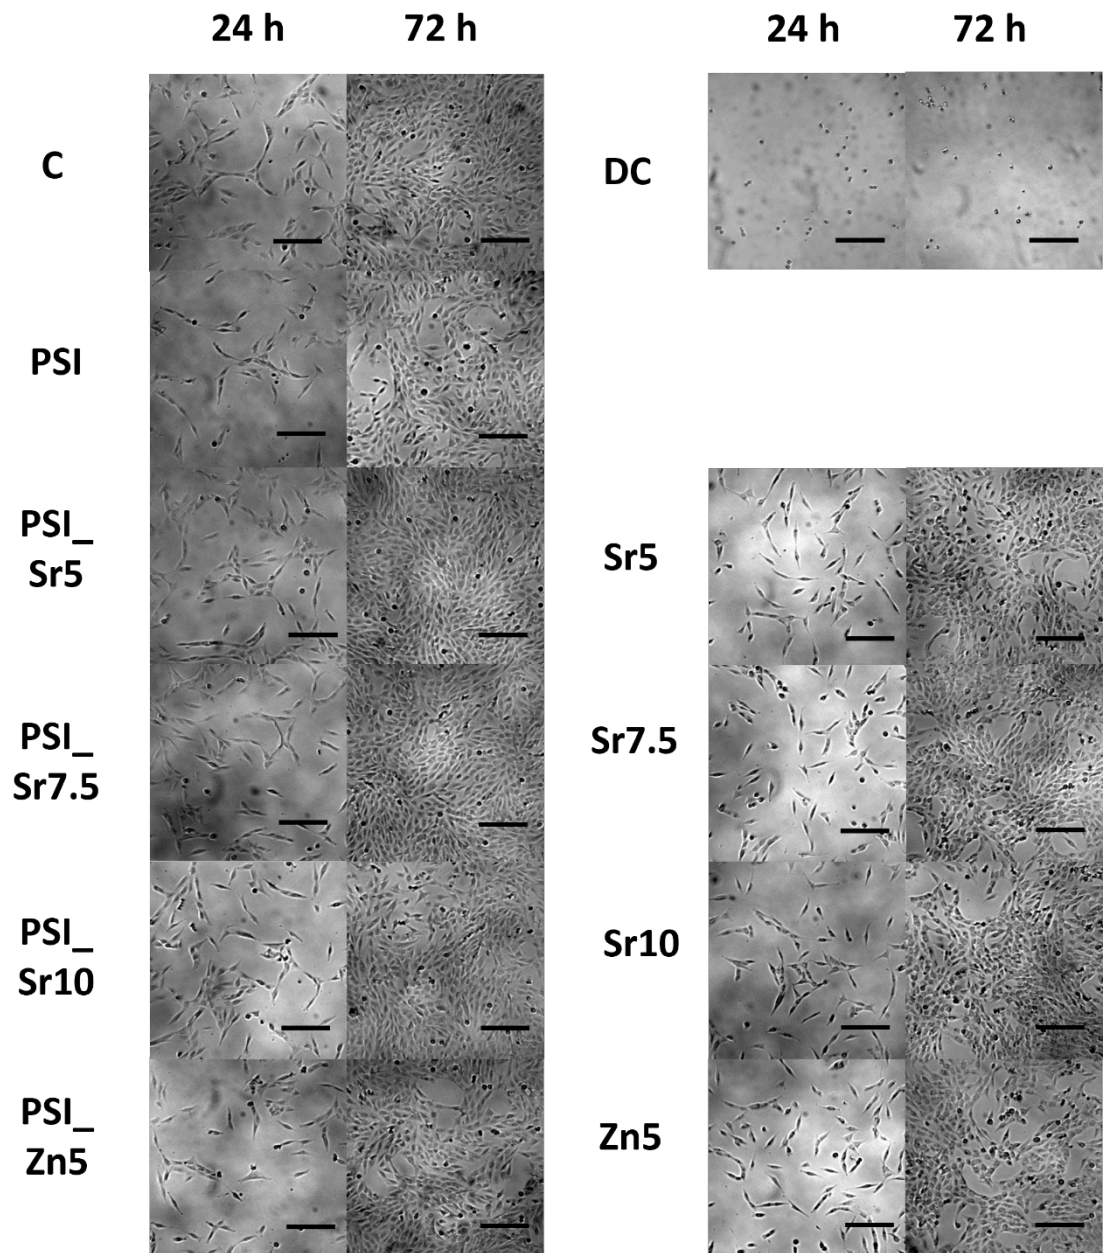

**Figure S7:** Phase-contrast microscopy images of the MG-63 cell line after treatment for 24 and 72 h with different concentrations of salts and extract of the scaffolds. The scale bars indicate 100 μm.

# 155BR cell line

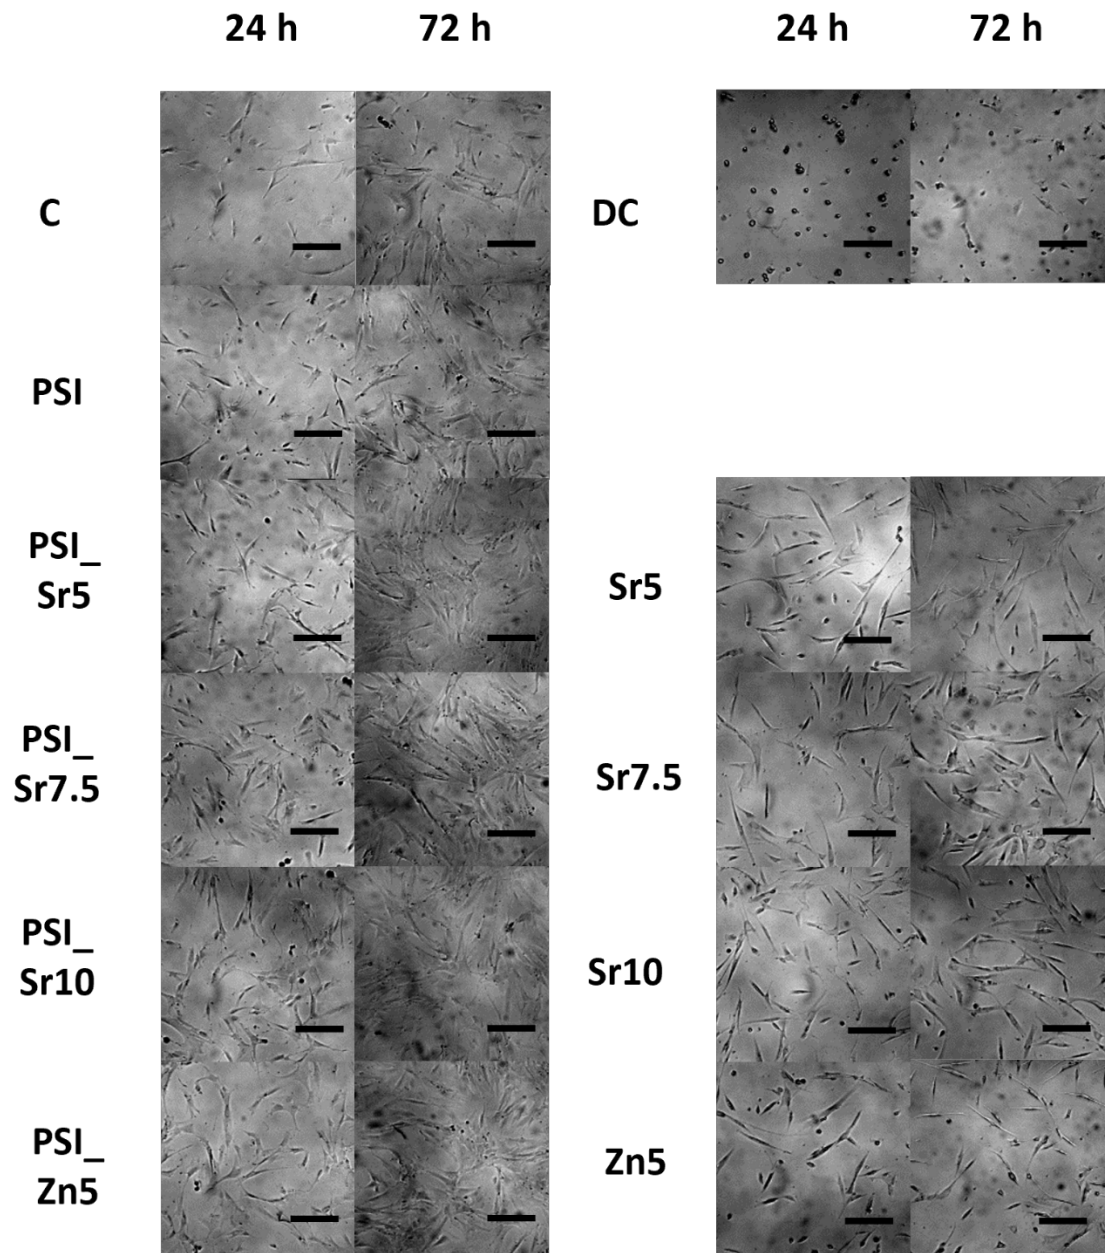

**Figure S8:** Phase-contrast microscopy images of the 155BR cell line after treatment for 24 and 72 h with different concentrations of the salts and extract of the scaffolds. The scale bars indicate 100 μm.
